# Supplementary material for: Electrical stimulation enhances neuronal cell activity mediated by Schwann cell derived exosomes
Source: PubMed Central journal article supplement (PMC6414536; doi:10.1038/s41598-019-41007-5), 2019-03-12
Supplement: 41598_2019_41007_MOESM1_ESM.pdf [file 41598_2019_41007_MOESM1_ESM.pdf]

## supplementary information

# Electrical stimulation enhances neuronal cell activity mediated by Schwann cell derived exosomes

Ming Hu<sup>1</sup>, Li Hong<sup>1\*</sup>, Cheng Liu<sup>1</sup>, Shasha Hong<sup>1</sup>, Songming He<sup>1</sup>, Min Zhou<sup>1</sup>,  
Guotao Huang<sup>1</sup>, Qian Chen<sup>1</sup>

<sup>1</sup>Dept. of Gynecology and Obstetrics, Renmin Hospital of Wuhan University, 238 Jiefang Road, Wuhan 430060, Hubei Province, China. Correspondence and requests for materials should be addressed to L.H. (email: lihong\_w hu@163.com)

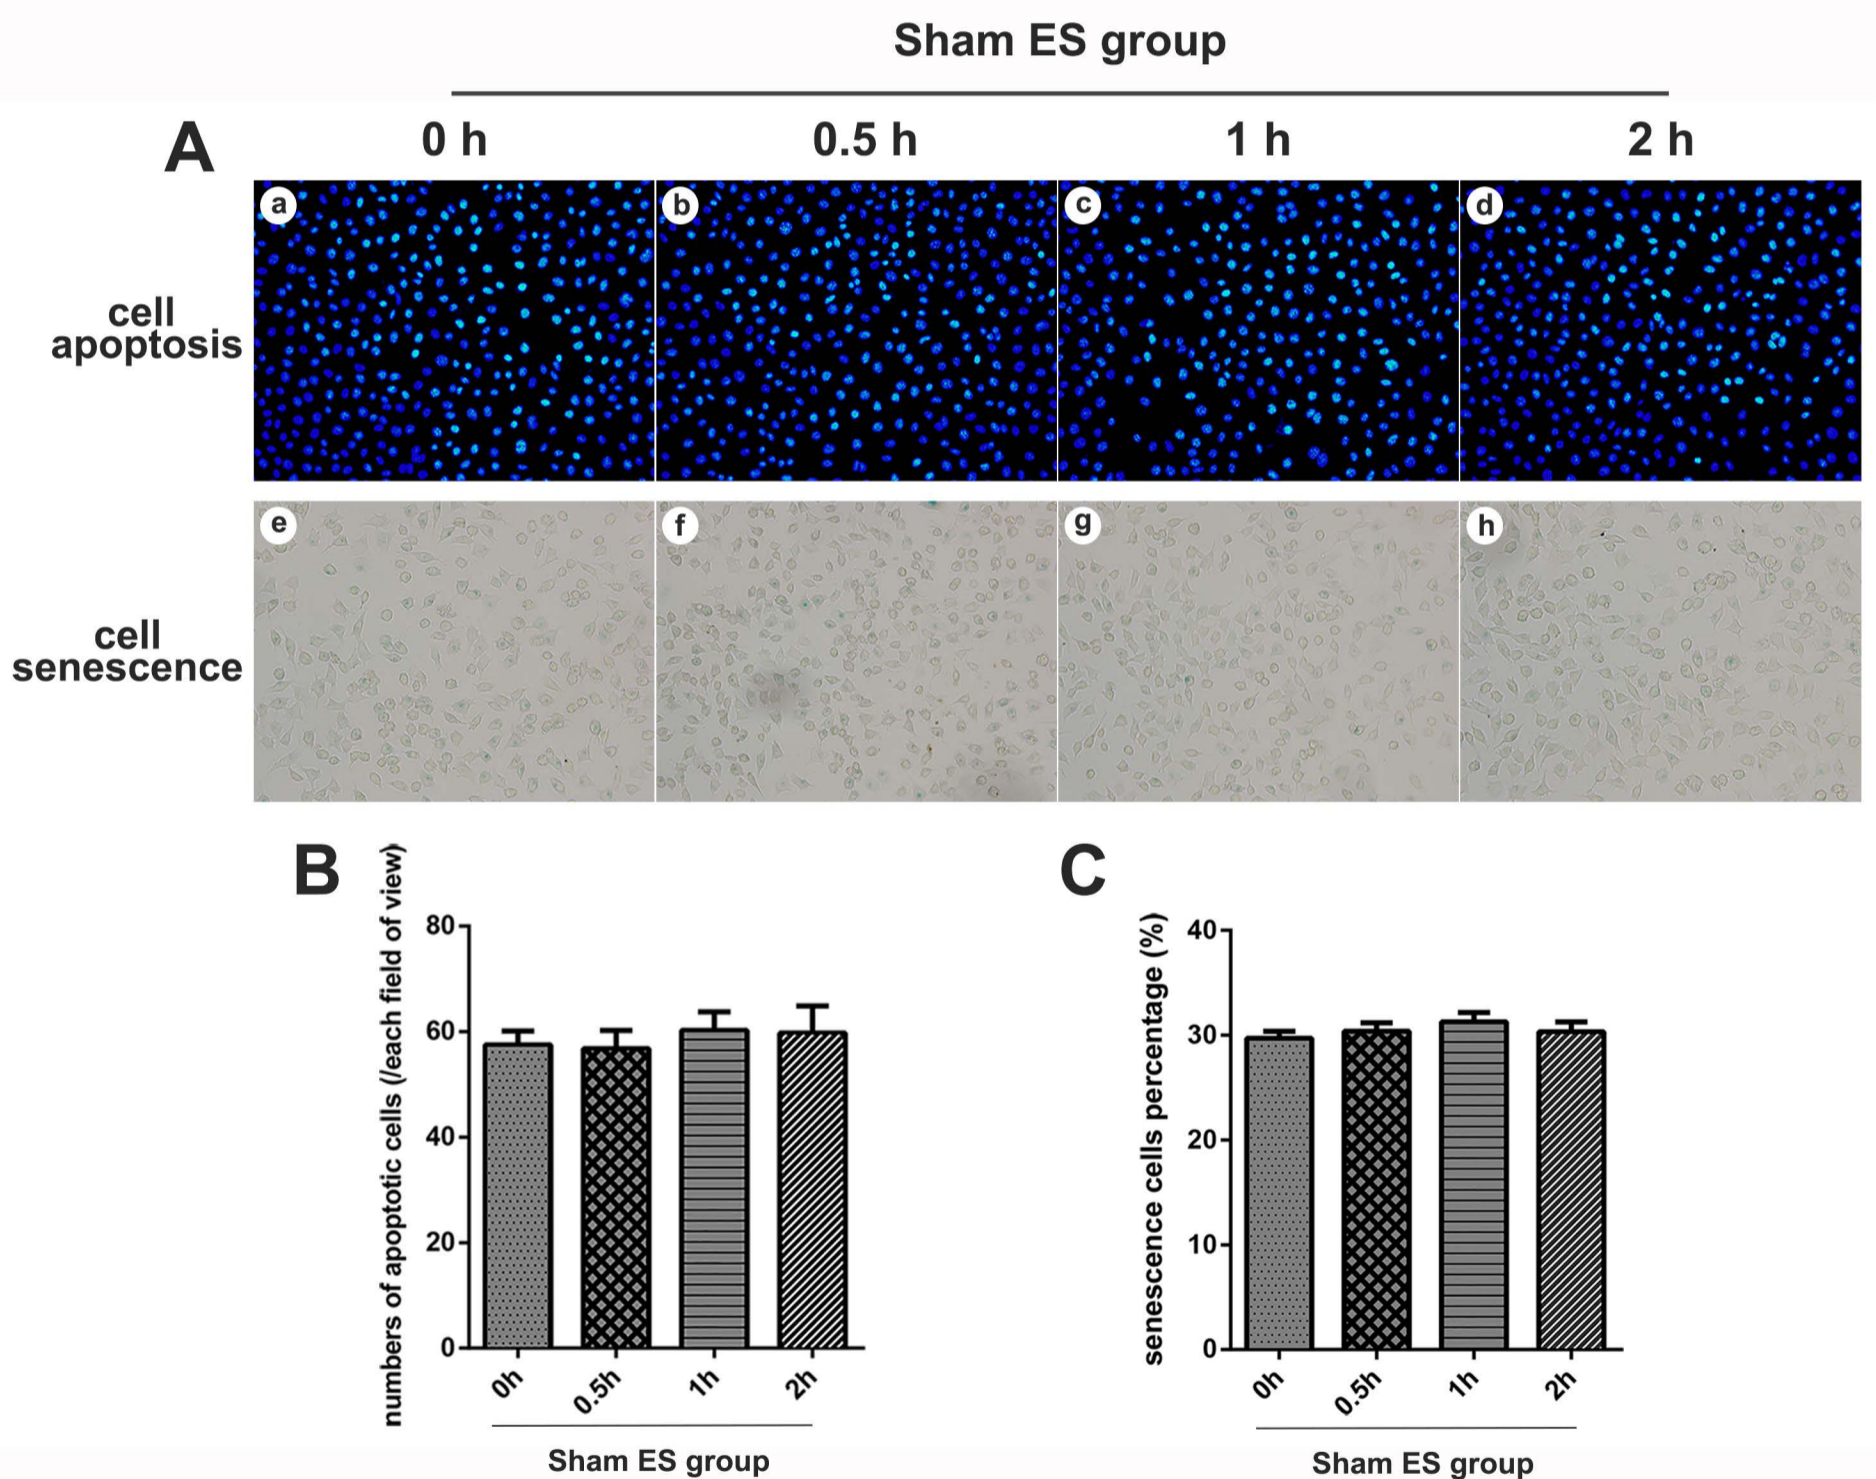

### Supplementary Fig. 1 Apoptosis and cell senescence in the Sham ES group at each time point.

(A a-d) DRG cell apoptosis staining at a 200 $\times$  magnification. a, b, c, and d indicate the occurrence of apoptosis at 0 h, 0.5 h, 1 h, and 2 h, respectively. (A e-h) DRG cell senescence staining at a 200 $\times$  magnification. e, f, g, and h indicate cell senescence at 0 h, 0.5 h, 1 h, and 2 h, respectively. (B) Quantitative analysis of apoptosis at each time point (0 h, 0.5 h, 1 h, and 2 h). (C) Quantitative analysis of cellular senescence at each time point (0 h, 0.5 h, 1 h, and 2 h).
